# Supplementary material for: Development and evaluation of rapid novel isothermal amplification assays for important veterinary pathogens: Chlamydia psittaci and Chlamydia pecorum
Source: PubMed Central journal article supplement (PMC5592900; doi:10.7717/peerj.3799), 2017-09-08
Supplement: peerj-05-3799-s005.pdf [file peerj-05-3799-s005.pdf]

Table S3. *C. pecorum* LAMP testing of clinical samples

*C. pecorum* koala clinical samples

| Sample    | Host   | Site   | Time to amplify | Melt  | qPCR copies/ul      | LAMP TC |
|-----------|--------|--------|-----------------|-------|---------------------|---------|
| Chloe U   | Koala  | UGT    | 14.00           | 83.15 | 3.5x10 <sup>4</sup> | POS     |
| Chloe R   |        | Rectal | 13.45           | 83.20 | 6.7x10 <sup>4</sup> | POS     |
| Koala R   |        | Rectal | 20.15           | 83.44 | 4x10 <sup>3</sup>   |         |
| Kall      |        | UGT    | 13.00           | 83.73 | BDL (14)            |         |
| Kaylum    |        | UGT    | 21.00           | 83.68 | NEG                 |         |
| Anastasia |        | Eye    | 0.00            | 0.00  | NEG                 | NEG     |
| K17 Eye   |        | Eye    | 25.30           | 83.25 | 35                  | POS     |
| k17 clo   |        | Cloaca | 23.30           | 83.14 | 140                 |         |
| k52       |        | Eye    | 0.00            | 0.00  | 1x10 <sup>3</sup>   | NEG     |
| k52 c     |        | Cloaca | 25.30           | 82.90 | 1.8x10 <sup>4</sup> | POS     |
| k20 c     |        | Cloaca | 17.45           | 83.20 | 2.5x10 <sup>4</sup> | POS     |
| K61185    |        | Eye    | 24.15           | 82.89 | 1.4x10 <sup>3</sup> | POS     |
| K61310    |        | Eye    | 20.15           | 83.54 | 4.7x10 <sup>3</sup> | POS     |
| K61254    |        | Eye    | 27.15           | 82.90 | 171                 | POS     |
| K61447    |        | Eye    | 23.15           | 83.00 | 248                 |         |
| K61452    |        | Eye    | 27.00           | 82.86 | 369                 |         |
| K61053    |        | Eye    | 25.45           | 82.23 | 41                  | POS     |
| K61832    |        | Eye    | 24.15           | 82.88 | BDL (14)            | NEG     |
| K61167    |        | Eye    | 29.00           | 82.72 | BDL (12)            | NEG     |
| K61818    |        | Eye    | 0.00            | 0.00  | NEG                 | NEG     |
| K61815    |        | Eye    | 0.00            | 0.00  | NEG                 |         |
| K61169    |        | Eye    | 18.45           | 83.57 | 1.6x10 <sup>3</sup> | POS     |
| K61808    |        | Eye    | 0.00            | 0.00  | NEG                 | NEG     |
| K61528    |        | Eye    | 26.30           | 82.78 | 1.6x10 <sup>3</sup> | POS     |
| K68199    |        | Eye    | 27.15           | 83.19 | 129                 | POS     |
| K67797    |        | Eye    | 19.00           | 83.09 | 114                 | POS     |
| K52866    |        | Eye    | 0.00            | 0.00  | NEG                 | NEG     |
| K60652    |        | Eye    | 0.00            | 0.00  | NEG                 | NEG     |
| K62402    |        | Eye    | 24.00           | 82.51 | BDL (11)            | POS     |
| K67556    |        | UGT    | 21.45           | 83.00 | 5.0x10 <sup>3</sup> |         |
| K13207    |        | UGT    | 24.00           | 82.85 | 422                 |         |
| R1-5      |        | UGT    | 17.00           | 83.34 | 1.2x10 <sup>4</sup> |         |
| R1-7      |        | Eye    | 19.45           | 83.00 | 1.6x10 <sup>3</sup> |         |
| R15-17    |        | Cloaca | 23.30           | 83.14 | 1x10 <sup>3</sup>   |         |
| s50       | Sheep  | Eye    | 0.00            | 0.00  | NEG                 |         |
| s50 r     |        | Rectal | 0.00            | 0.00  | BDL (35)            |         |
| S87       |        | Eye    | 26.00           | 83.57 | 1.1x10 <sup>3</sup> | POS     |
| S88       |        | Rectal | 0.00            | 0.00  | NEG                 |         |
| S57       |        | Rectal | 26.30           | 83.87 | 1.1x10 <sup>3</sup> | POS     |
| S47       |        | Eye    | 0.00            | 0.00  | NEG                 | NEG     |
| Lamb1     |        | Eye    | 27              | 83.14 | BDL (14)            | POS     |
| Lamb1     |        | Joint  | 0.00            | 0.00  | NEG                 | NEG     |
| A6        |        | Fecal  | 38.60           | 82.99 | 300                 |         |
| A9        |        | Eye    | 35.00           | 83.24 | 68                  |         |
| B2        |        | Eye    | 25.45           | 83.45 | 286                 |         |
| B3        |        | Fecal  | 0.00            | 83.12 | NEG                 |         |
| B4        |        | Eye    | 35.40           | 83.40 | BDL (5)             |         |
| B5        |        | Fecal  | 0.00            | 0.00  | NEG                 |         |
| R106      |        | Rectal | 0.00            | 82.83 | NEG                 |         |
| Sheep 17  |        | Rectal | 25.30           | 83.50 | 127.00              | POS     |
| 1R        | Cattle | Rectal | 0.00            | 0.00  | NEG                 | NEG     |
| 5R        |        | Rectal | 0.00            | 0.00  | NEG                 | NEG     |
| 20R       |        | Rectal | 0.00            | 0.00  | NEG                 | NEG     |
| 2R        |        | Rectal | 0.00            | 0.00  | NEG                 | NEG     |
| 7R        |        | Rectal | 0.00            | 0.00  | NEG                 | NEG     |
| 11R       |        | Rectal | 0.00            | 0.00  | NEG                 | NEG     |
| 14R       |        | Rectal | 0.00            | 0.00  | NEG                 |         |
| 18R       |        | Rectal | 25.20           | 83.57 | NEG                 | POS     |
| 20aR      |        | Rectal | 0.00            | 0.00  | NEG                 |         |
| Cow       |        | Brain  | 25.30           | 83.83 | 110                 | POS     |
| Cow65     |        | Brain  | 18.30           | 83.43 | 1.1x10 <sup>3</sup> |         |
| Cow65     |        | Heart  | 28.30           | 83.77 | 1x10 <sup>3</sup>   |         |
| Cow31     |        | Kidney | 0.00            | 0.00  | NEG                 |         |

**Legend**

|  |                  |
|--|------------------|
|  | disagree         |
|  | agree            |
|  | agree - negative |
